# Supplementary material for: Differentiating between Enterococcusfaecium and Enterococcuslactis by Matrix-Assisted Laser Desorption Ionization Time-of-Flight Mass Spectrometry
Source: MDPI journal article supplement (doi:10.3390/foods11071046), 2022-04-05
Supplement: s1 [file s1]

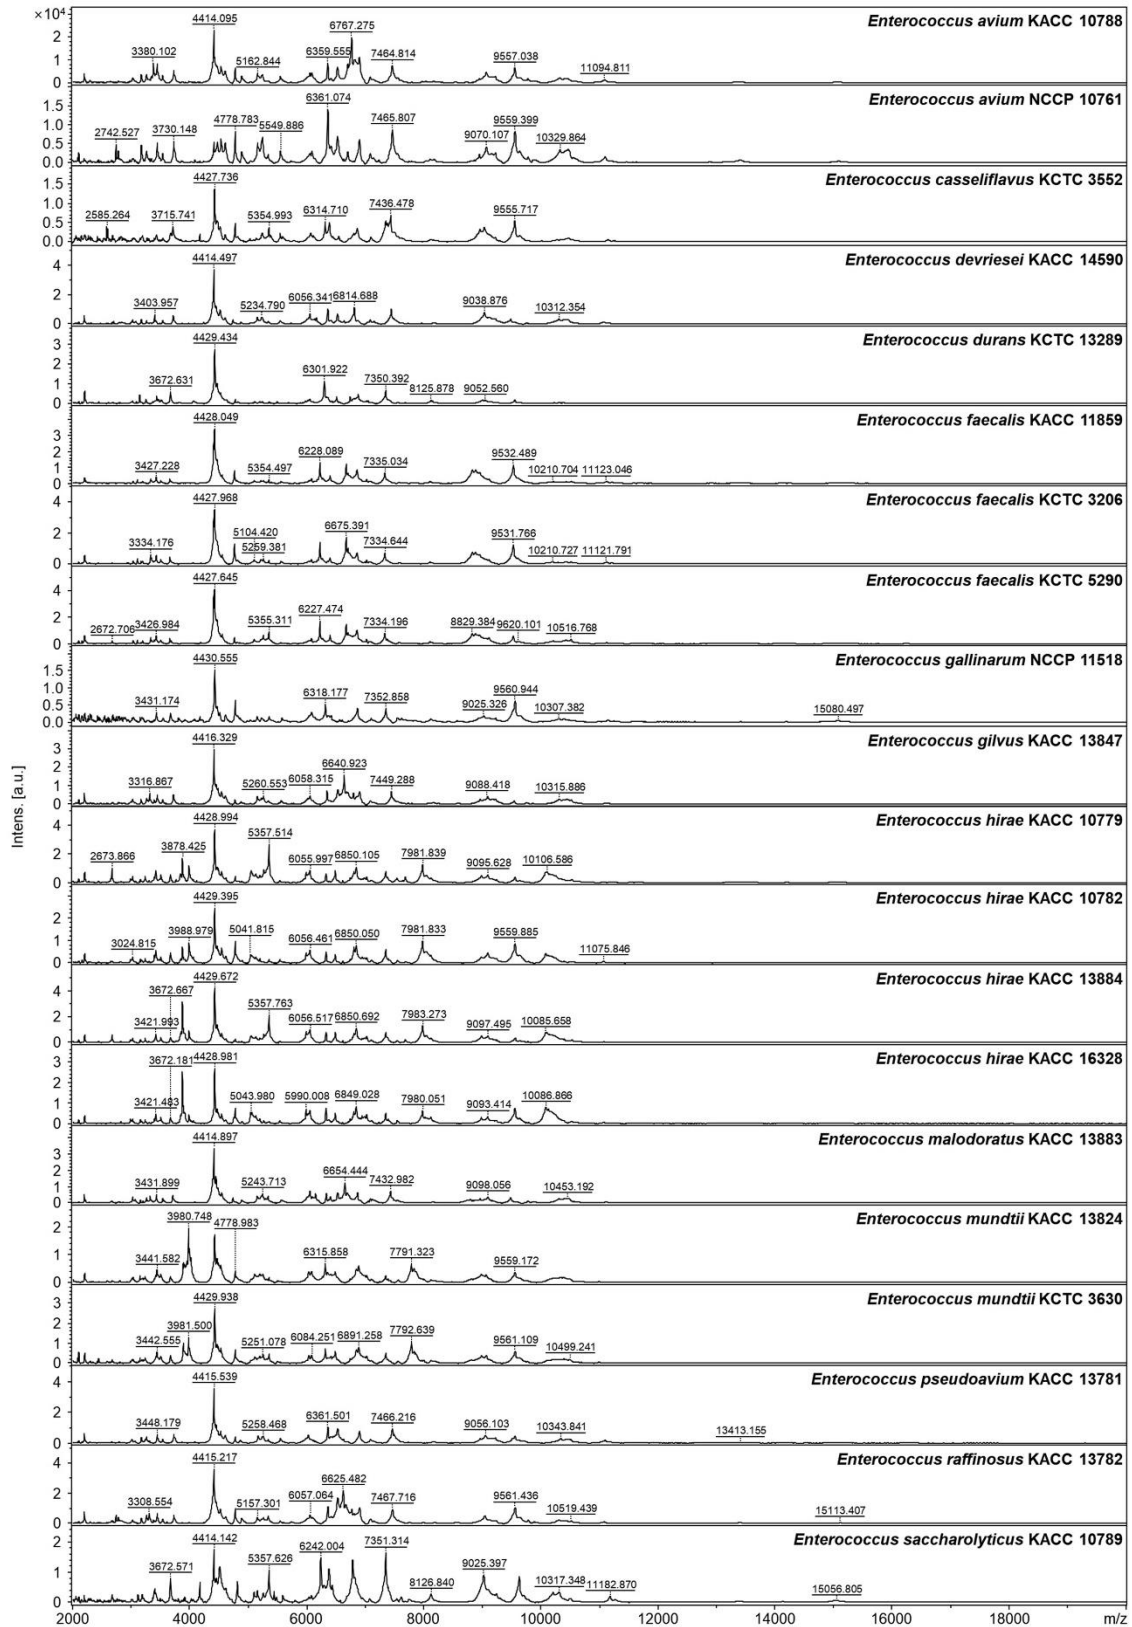

**Figure S1.** The mass spectra of reference strains of *E. avium*, *E. casseliflavus*, *E. devriesei*, *E. durans*, *E. faecalis*, *E. gallinarum*, *E. gilvus*, *E. hirae*, *E. malodoratus*, *E. mundtii*, *E. pseudoavium*, *E. raffinosus*, *E. saccharolyticus*; m/z, mass-to-charge ratio; a.u., arbitrary units.
